# Supplementary material for: A simple mechanism for integration of quorum sensing and cAMP signalling in Vibrio cholerae
Source: eLife journal article supplement (doi:10.7554/elife.86699), 2023-04-05

# Figure 2-figure supplement 1

## Figure 2b

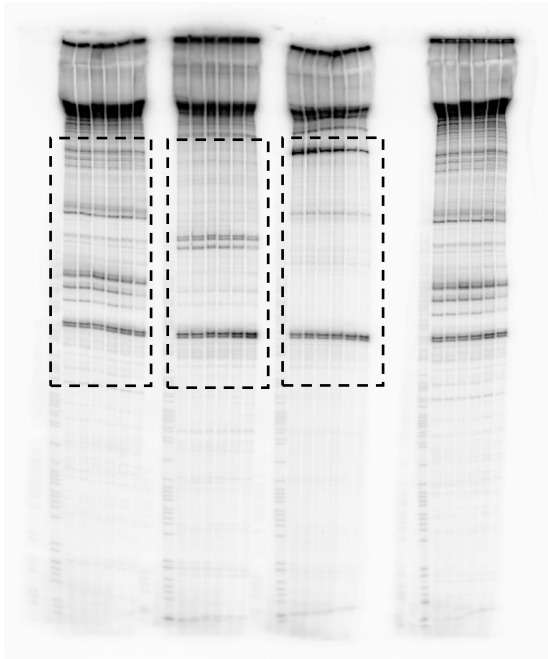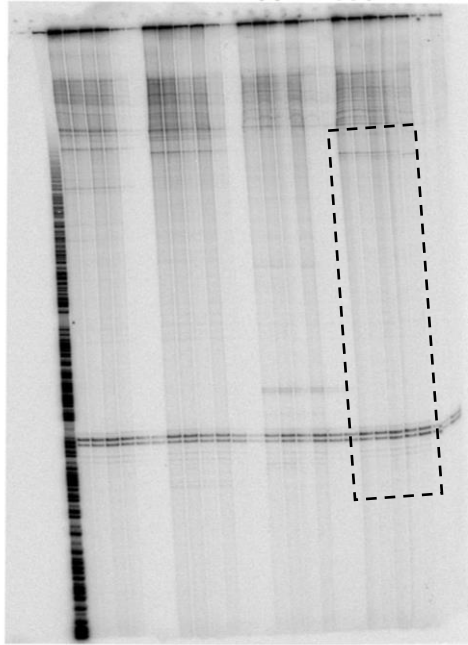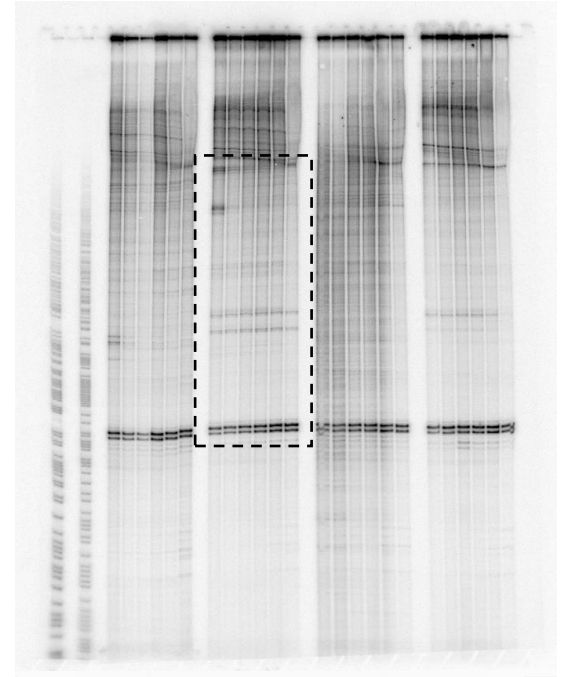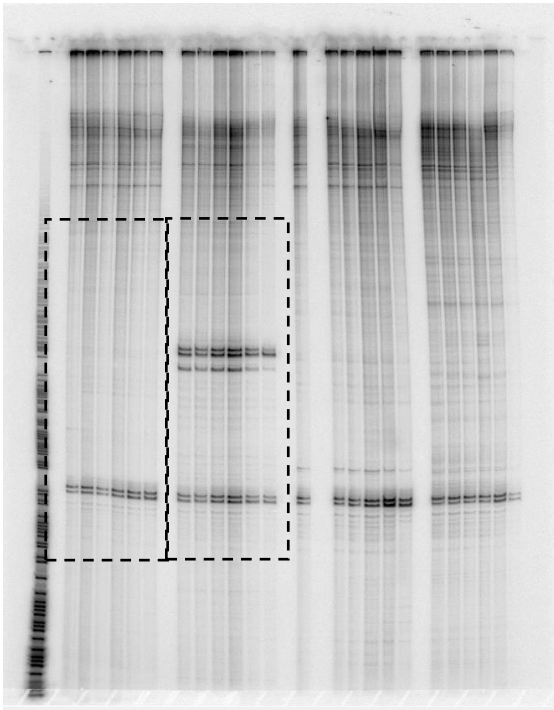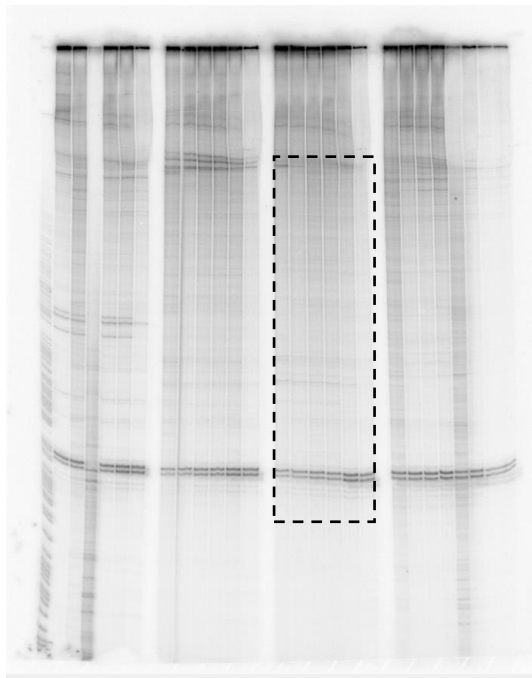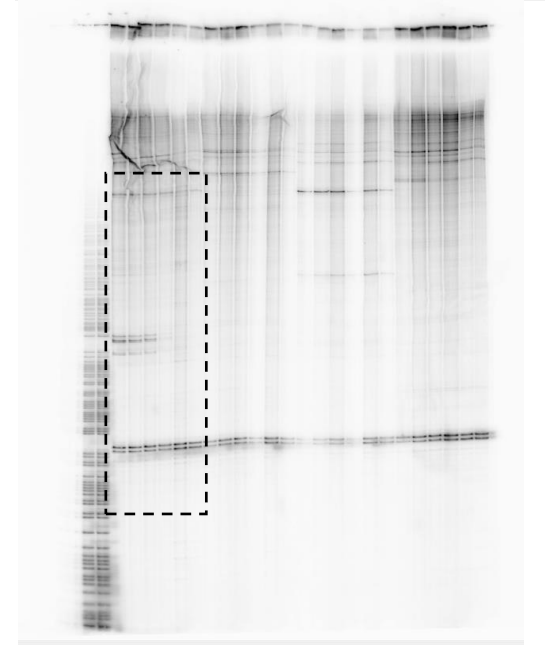

## Figure 3c

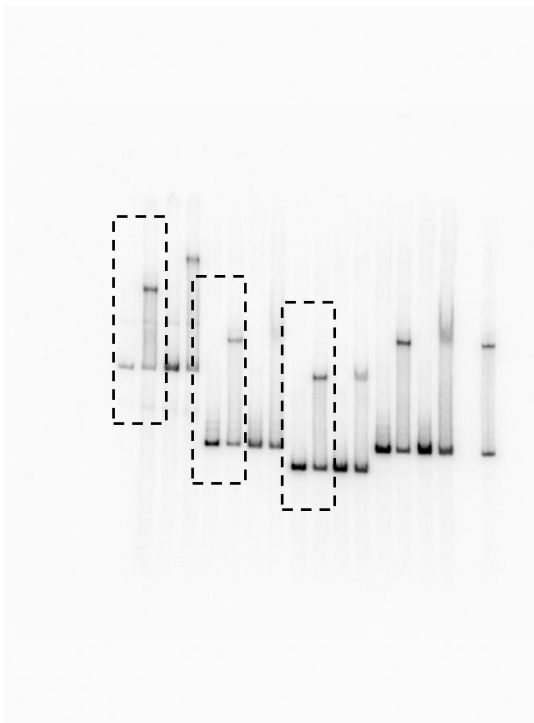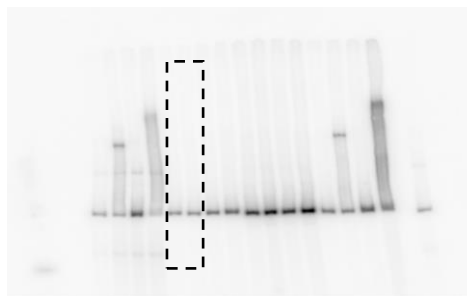

## Figure 3d

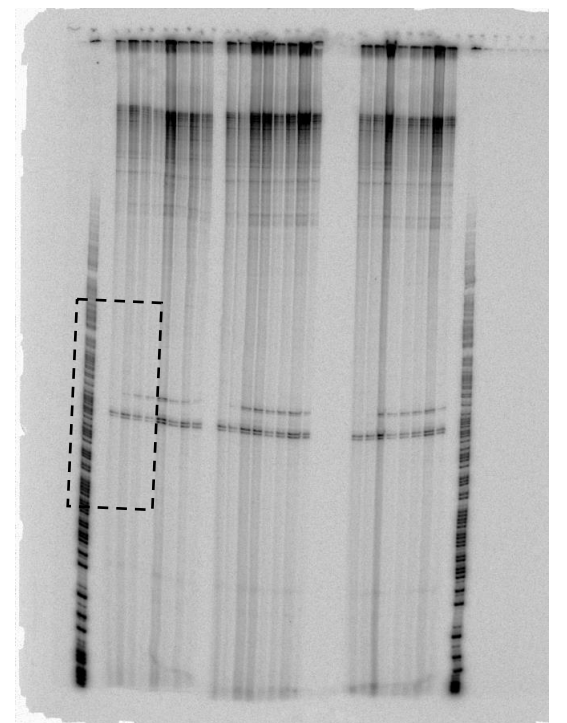

Figure 4a

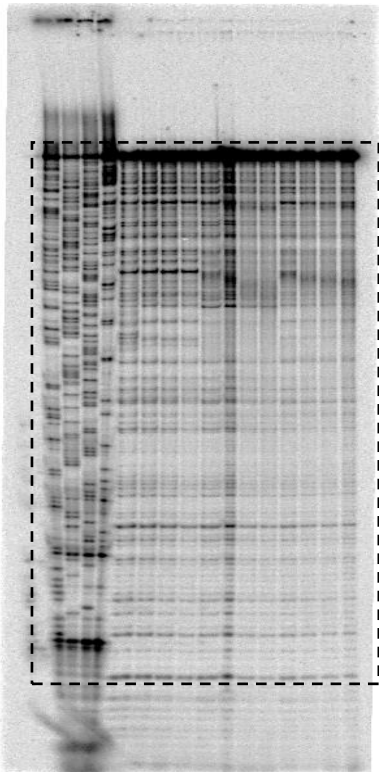

Figure 4b

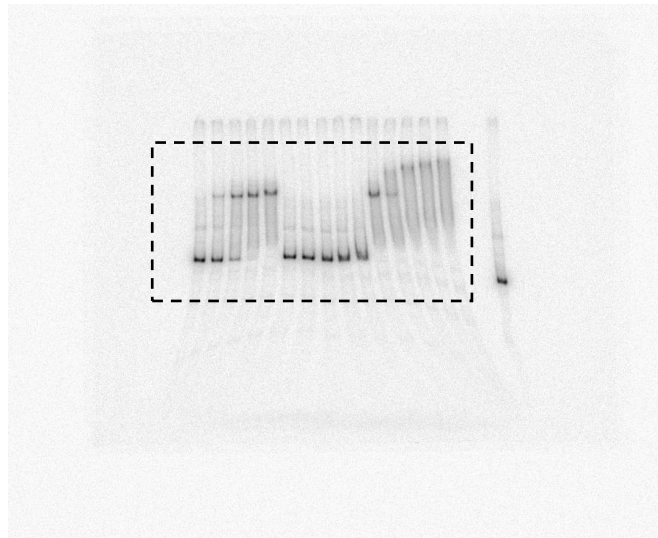

Figure 4d

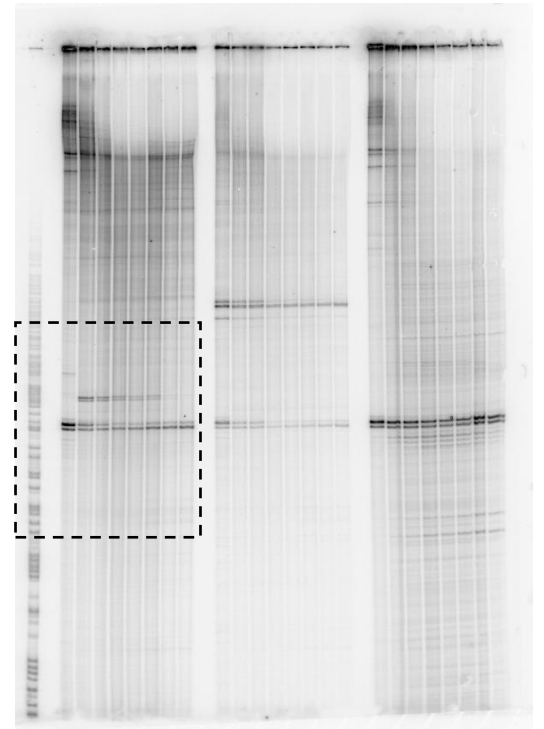

Figure 4c

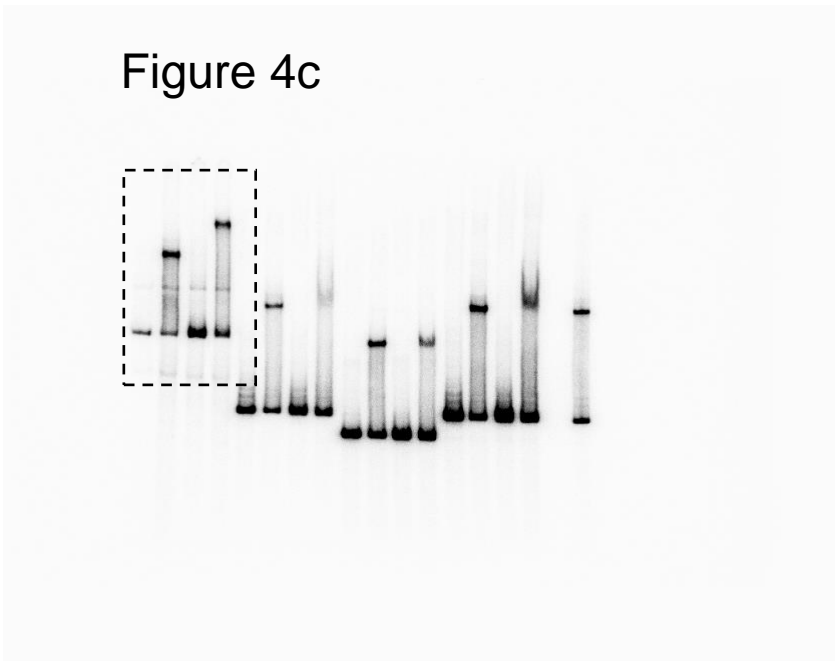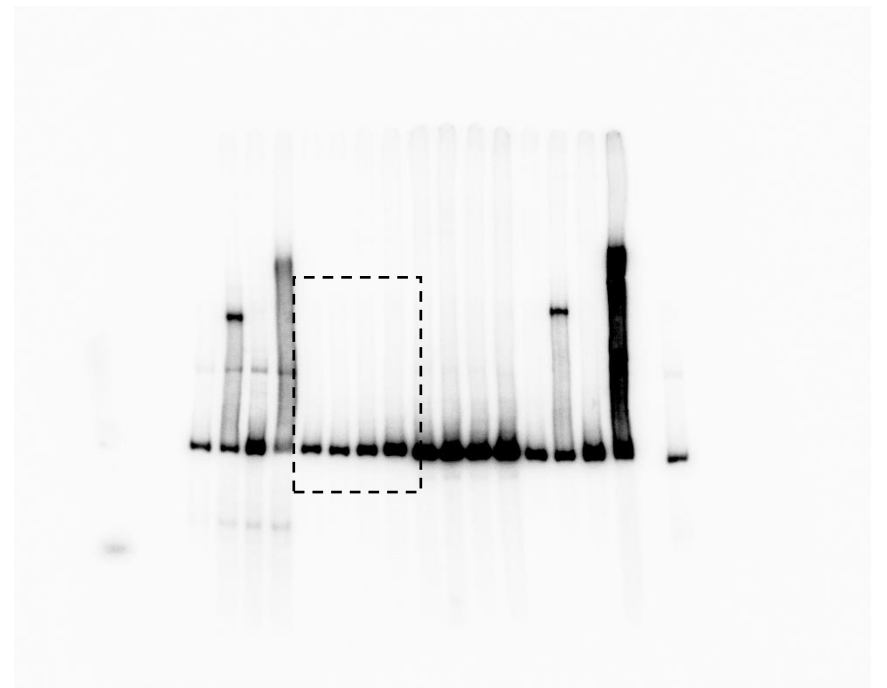

Figure 5d

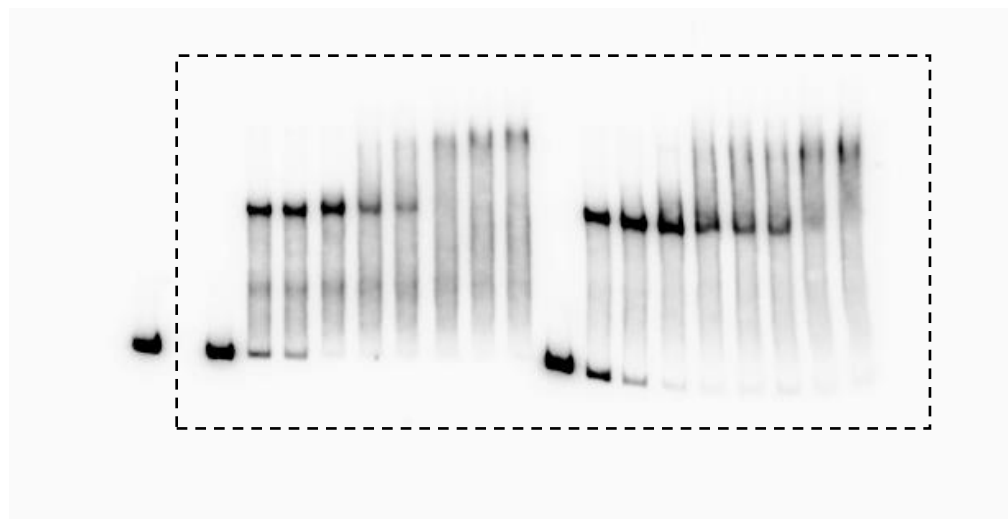

Figure 5e

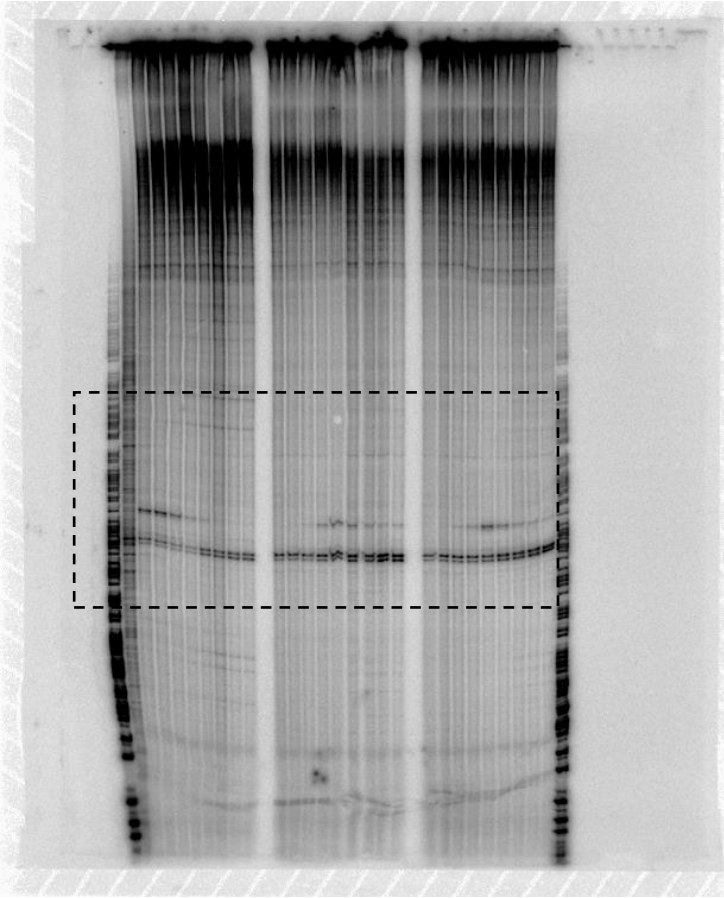

Figure 4 figure supplement 1

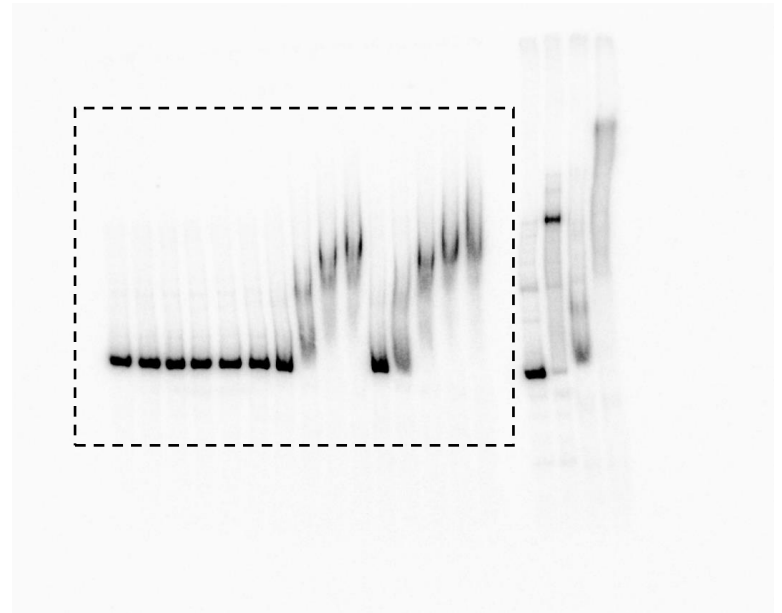

Figure 5-figure supplement 3

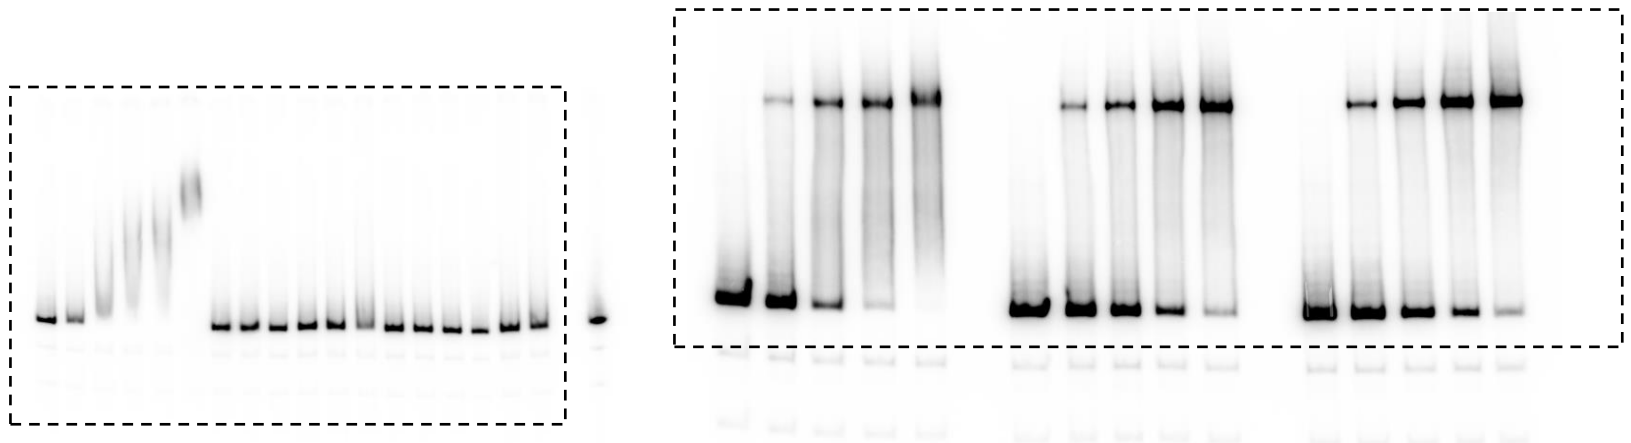

Figure 5-figure supplement 4

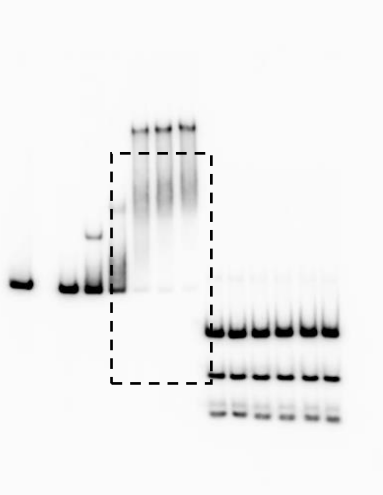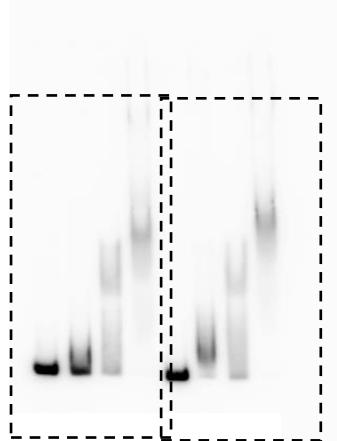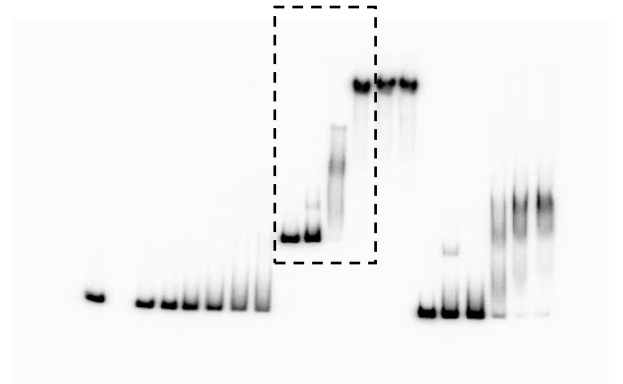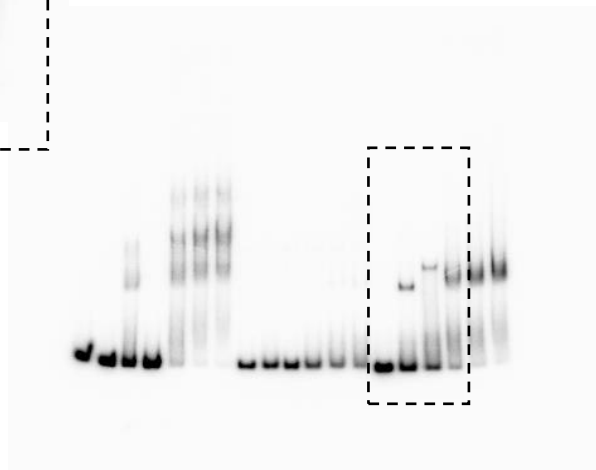

Supplement: fig2-data7 [file elife-86699-fig2-data7-v1.pdf]
