# Supplementary material for: A simple mechanism for integration of quorum sensing and cAMP signalling in Vibrio cholerae
Source: eLife journal article supplement (doi:10.7554/elife.86699), 2023-04-05

THE UNIVERSITY OF CHICAGO LIBRARY  
540 EAST 57TH STREET, CHICAGO, ILL. 60637  
TEL: 773-936-3000 FAX: 773-936-3000  
WWW.CHICAGO.LIBRARY.EDU

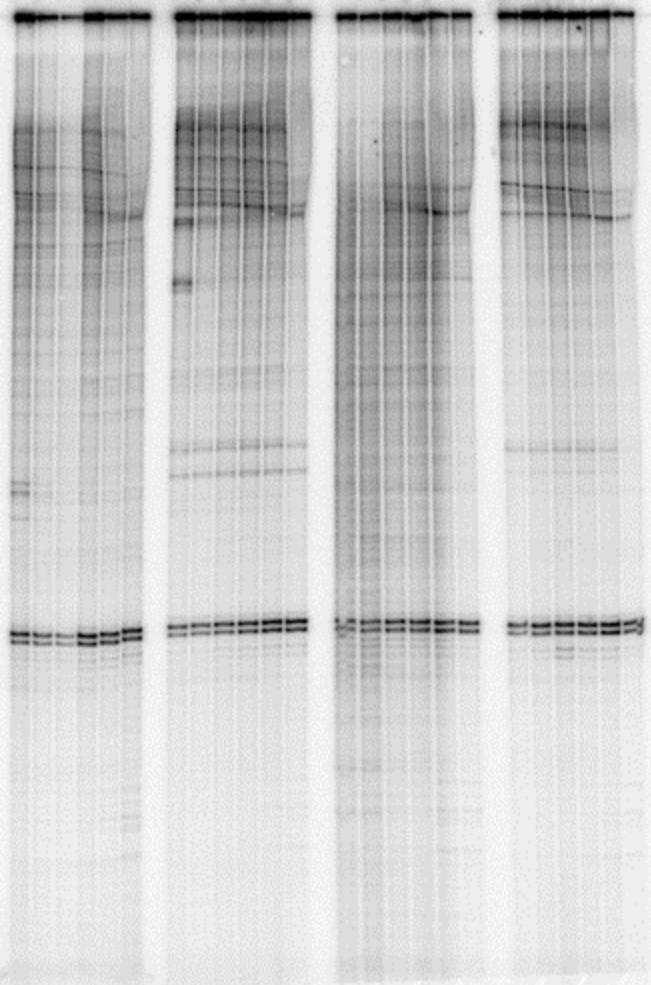

Supplement: fig2-data3 [file elife-86699-fig2-data3-v1.pdf]
