# Supplementary material for: A simple mechanism for integration of quorum sensing and cAMP signalling in Vibrio cholerae
Source: eLife journal article supplement (doi:10.7554/elife.86699), 2023-04-05
Supplement: fig2-data5 [file elife-86699-fig2-data5-v1.pdf]

THE UNIVERSITY OF CHICAGO LIBRARY
