# Supplementary material for: A simple mechanism for integration of quorum sensing and cAMP signalling in Vibrio cholerae
Source: eLife journal article supplement (doi:10.7554/elife.86699), 2023-04-05

1000  
900  
800  
700  
600  
500  
400  
300  
200  
100  
0

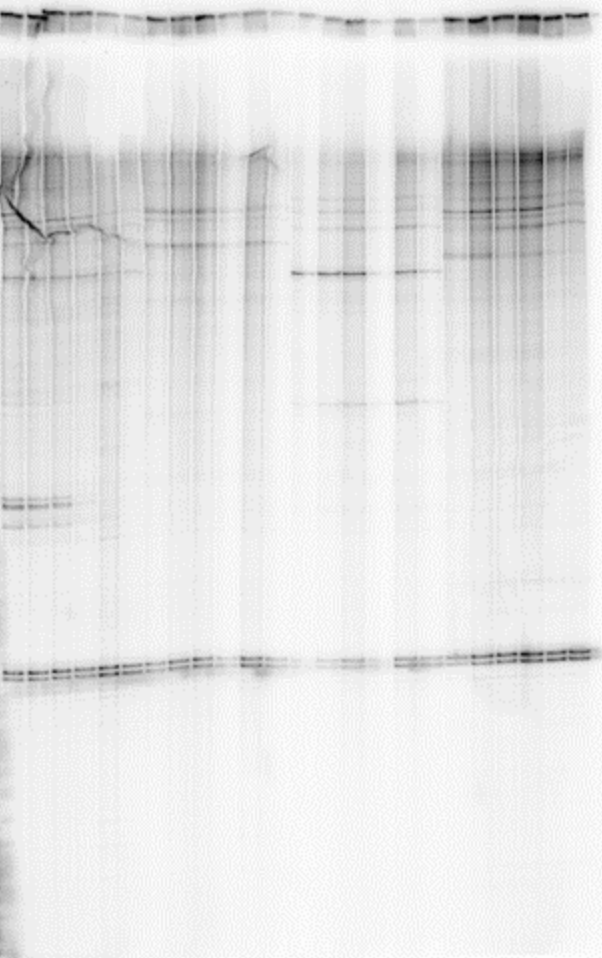

Supplement: fig2-data6 [file elife-86699-fig2-data6-v1.pdf]
