# Supplementary material for: A simple mechanism for integration of quorum sensing and cAMP signalling in Vibrio cholerae
Source: eLife journal article supplement (doi:10.7554/elife.86699), 2023-04-05

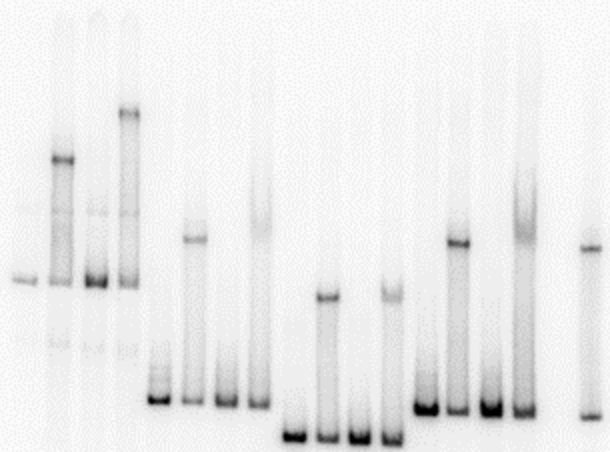

Supplement: fig3-data1 [file elife-86699-fig3-data1-v1.pdf]
