# Supplementary material for: A simple mechanism for integration of quorum sensing and cAMP signalling in Vibrio cholerae
Source: eLife journal article supplement (doi:10.7554/elife.86699), 2023-04-05
Supplement: fig4-data1 [file elife-86699-fig4-data1-v1.pdf]

| DATE   | DESCRIPTION | AMOUNT | BALANCE |
|--------|-------------|--------|---------|
| 1901   |             |        |         |
| Jan 1  | Balance     |        |         |
| Jan 15 | ...         |        |         |
| Jan 30 | ...         |        |         |
| Feb 15 | ...         |        |         |
| Feb 30 | ...         |        |         |
| Mar 15 | ...         |        |         |
| Mar 30 | ...         |        |         |
| Apr 15 | ...         |        |         |
| Apr 30 | ...         |        |         |
| May 15 | ...         |        |         |
| May 30 | ...         |        |         |
| Jun 15 | ...         |        |         |
| Jun 30 | ...         |        |         |
| Jul 15 | ...         |        |         |
| Jul 30 | ...         |        |         |
| Aug 15 | ...         |        |         |
| Aug 30 | ...         |        |         |
| Sep 15 | ...         |        |         |
| Sep 30 | ...         |        |         |
| Oct 15 | ...         |        |         |
| Oct 30 | ...         |        |         |
| Nov 15 | ...         |        |         |
| Nov 30 | ...         |        |         |
| Dec 15 | ...         |        |         |
| Dec 30 | ...         |        |         |
| Total  |             |        |         |
