# Supplementary material for: A simple mechanism for integration of quorum sensing and cAMP signalling in Vibrio cholerae
Source: eLife journal article supplement (doi:10.7554/elife.86699), 2023-04-05
Supplement: fig5-data1 [file elife-86699-fig5-data1-v1.pdf]

1

2

3  
4  
5  
6  
7  
8  
9  
10

11

12  
13  
14  
15  
16  
17  
18  
19
