# Supplementary material for: A simple mechanism for integration of quorum sensing and cAMP signalling in Vibrio cholerae
Source: eLife journal article supplement (doi:10.7554/elife.86699), 2023-04-05
Supplement: supp1 [file elife-86699-supp1-v1.pdf]

**Table S1: HapR binding targets identified by previous studies**

| gene(s)          | evidence <sup>1</sup>   | source | detected by ChIP-seq <sup>2</sup> |
|------------------|-------------------------|--------|-----------------------------------|
| VC0583           | EMSA, DNase I footprint | (1)    | yes                               |
| VC2647           | EMSA, DNase I footprint | (2)    | no                                |
| VCA0865          | not shown directly      | (3)    | yes (below cut-off)               |
| VCA0952          | EMSA                    | (4)    | yes (below cut-off)               |
| VC2370           | EMSA                    | (4)    | no                                |
| VC0900           | EMSA                    | (4)    | no                                |
| VC1851           | EMSA                    | (4)    | yes                               |
| VC1086           | EMSA                    | (4)    | no                                |
| VCA0074          | EMSA                    | (4)    | no                                |
| VCA0246<>VCA0247 | EMSA                    | (5)    | yes (below cut-off)               |
| VC1222           | EMSA                    | (5)    | no                                |
| VC1181           | EMSA                    | (5)    | no                                |
| VC0432           | EMSA                    | (5)    | no                                |
| VC2762           | EMSA                    | (5)    | no                                |
| VC1000           | EMSA                    | (5)    | no                                |
| VC2634<>VC2635   | EMSA                    | (5)    | no                                |
| VCA0017          | EMSA                    | (5)    | yes (below cut-off)               |
| VCA0182<>VCA0183 | EMSA                    | (5)    | no                                |
| VC0166<>VC0167   | EMSA                    | (5)    | no                                |
| VC1415           | EMSA                    | (5)    | yes (below cut-off)               |
| VCA0880          | EMSA                    | (5)    | yes (below cut-off)               |
| VCA0684          | EMSA                    | (5)    | no                                |
| VC2674           | EMSA                    | (5)    | no                                |
| VC1213           | EMSA                    | (5)    | yes (below cut-off)               |
| VC2035           | EMSA                    | (5)    | no                                |
| VC0089           | EMSA                    | (5)    | no                                |
| VCA0865          | EMSA                    | (5)    | yes (below cut-off)               |
| VCA0148          | EMSA                    | (5)    | yes                               |
| VC0934           | EMSA                    | (5)    | no                                |
| VC0241           | EMSA                    | (5)    | yes                               |

<sup>1</sup>The column lists evidence for direct binding either using electrophoretic mobility shift assay (EMSA) or DNase I footprinting.

<sup>2</sup>The column lists evidence for binding from ChIP-seq assays. In cases where a binding peak was evident upon visual inspection, but this fell below our stringent cut-off, this is indicated.

1. Lin, W., Kovacicova, G. & Skorupski, K. Requirements for *Vibrio cholerae* HapR binding and transcriptional repression at the hapR promoter are distinct from those at the aphA promoter. *J. Bacteriol.* **187**, 3013–3019 (2005).
2. Kovacicova, G. & Skorupski, K. Regulation of virulence gene expression in *Vibrio cholerae* by quorum sensing: HapR functions at the aphA promoter. *Mol. Microbiol.* **46**, 1135–1147 (2002).
3. Silva, A. J., Pham, K. & Benitez, J. A. Haemagglutinin/protease expression and mucin gel penetration in El Tor biotype *Vibrio cholerae*. *Microbiology* **149**, 1883–1891 (2003).
4. Waters, C. M., Lu, W., Rabinowitz, J. D. & Bassler, B. L. Quorum sensing controls biofilm formation in *Vibrio cholerae* through modulation of cyclic Di-GMP levels and repression of vpsT. *J. Bacteriol.* **190**, 2527–2536 (2008).
5. Tsou, A. M., Cai, T., Liu, Z., Zhu, J. & Kulkarni, R. V. Regulatory targets of quorum sensing in *Vibrio cholerae*: Evidence for two distinct HapR-binding motifs. *Nucleic Acids Res.* **37**, 2747–2756 (2009).
