# Supplementary material for: A simple mechanism for integration of quorum sensing and cAMP signalling in Vibrio cholerae
Source: eLife journal article supplement (doi:10.7554/elife.86699), 2023-04-05
Supplement: supp2 [file elife-86699-supp2-v1.pdf]

**Table S2:** Strains, plasmids, and oligonucleotides

| Name                                                               | Description                                                                                                                                                                                        | Source    |
|--------------------------------------------------------------------|----------------------------------------------------------------------------------------------------------------------------------------------------------------------------------------------------|-----------|
| <b>Bacterial Strains</b>                                           |                                                                                                                                                                                                    |           |
| <i>Vibrio cholerae</i> <sup>1</sup>                                |                                                                                                                                                                                                    |           |
| E7946                                                              | Wildtype <i>Vibrio cholerae</i> El Tor Ogawa derivative, SmR                                                                                                                                       | (1)       |
| E7946 $\Delta hapR$                                                | E7946 derivative lacking <i>hapR</i>                                                                                                                                                               | This work |
| E7946 $\Delta crp$                                                 | E7946 derivative lacking <i>crp</i>                                                                                                                                                                | This work |
| E7946 $\Delta hapR\Delta crp$                                      | E7946 derivative lacking <i>hapR</i> and <i>crp</i>                                                                                                                                                | This work |
| E7946 $\Delta luxO$                                                | E7946 derivative lacking <i>luxO</i>                                                                                                                                                               | This work |
| E7946 $\Delta hapR$                                                | E7946 derivative <i>hapR::Spec<sup>R</sup></i>                                                                                                                                                     | This work |
| E7946 $\Delta luxO\Delta hapR$                                     | E7946 derivative lacking <i>luxO</i> , <i>hapR::Spec<sup>R</sup></i>                                                                                                                               | This work |
| E7946 $\Delta murP$                                                | E7946 derivative lacking <i>murP</i>                                                                                                                                                               | (2)       |
| <i>Escherichia coli</i>                                            |                                                                                                                                                                                                    |           |
| DH5 $\alpha$                                                       | <i>fhuA2</i> $\Delta(argF-lacZ)$ U169 <i>phoA glnV44</i> $\Phi 80$ $\Delta(lacZ)$ M15<br><i>gyrA96 recA1 relA1 endA1 thi-1 hsdR17</i>                                                              | NEB       |
| T7 Express                                                         | <i>fhuA2 lacZ::T7 gene1 [lon] ompT gal sulA11 R(mcr-73::mini</i><br><i>Tn10--Tet<sup>S</sup>)2 [dcm] R(zgb-210::Tn10--Tet<sup>S</sup>) endA1 <math>\Delta(mcrC-</math></i><br><i>mrr)114::IS10</i> | NEB       |
| JCB387                                                             | $\Delta nirB$ , $\Delta lac$                                                                                                                                                                       | (3)       |
| S17 $\lambda pir$                                                  | <i>lacU169 (lacZM15), recA1, endA1, hsdR17, thi-1, gyrA96,</i><br><i>relA1, pir</i>                                                                                                                | (4)       |
| <b>Plasmids</b>                                                    |                                                                                                                                                                                                    |           |
| pSR                                                                | pBR322-derived plasmid. Features cloning site upstream<br>$\lambda$ oop transcription terminator. AmpR                                                                                             | (5)       |
| pRW50T                                                             | A broad-host range <i>lacZ</i> expression vector encoding <i>oriT</i><br>of pRK, TetR, Tra+                                                                                                        | (6)       |
| pAMNF                                                              | Plasmid for basal expression of N-terminal 3xFLAG-tagged<br>proteins, KanR                                                                                                                         | (7)       |
| pAMCF                                                              | Plasmid for basal expression of C-terminal 3xFLAG-tagged<br>proteins, KanR                                                                                                                         | (7)       |
| pRK2013                                                            | Helper plasmid for conjugation, KanR, oriColE1, RK2-, Mob+,<br>Tra+                                                                                                                                | (8)       |
| pKAS32                                                             | Suicide plasmid for mutant strain construction, AmpR                                                                                                                                               | (9)       |
| <b>Oligonucleotides</b> <sup>2,3</sup>                             |                                                                                                                                                                                                    |           |
| Oligonucleotides for cloning <i>hapR</i> or <i>luxO</i> (5' to 3') |                                                                                                                                                                                                    |           |
| <i>hapR</i>  pAMNF fwd                                             | GGCTGCGGTACCATGGACGCATCAATCGAAAAACGC                                                                                                                                                               | This work |
| <i>hapR</i>  pAMNF rev                                             | GCCCGAAGCTTCTAGTTCTTATAGATACACAGCATAT<br>TGAGG                                                                                                                                                     | This work |

|                        |                                                                                                                      |           |
|------------------------|----------------------------------------------------------------------------------------------------------------------|-----------|
| <i>luxO</i>  pAMCF fwd | GGCTGCGGTACCATGGTAGAAGACACGGCGTCGGTG<br>GCGGCGCTGTATCGTTCTTACCTCACACCGCTGGATA<br>TTGATATCAATATCGTGGGT <u>ACGGGAC</u> | This work |
|------------------------|----------------------------------------------------------------------------------------------------------------------|-----------|

|                          |                           |           |
|--------------------------|---------------------------|-----------|
| <i>luxO</i>  pAMCF rev.1 | ATCGCGTCCCCTACCCACGATATTG | This work |
|--------------------------|---------------------------|-----------|

|                          |                                  |           |
|--------------------------|----------------------------------|-----------|
| <i>luxO</i>  pAMCF rev.2 | GCCCGAAGCTTCCGTTCTTCTTTTTCTTTTAC | This work |
|--------------------------|----------------------------------|-----------|

Oligonucleotides for cloning regulatory regions in pRW50T and pSR (5' to 3')

|                   |                                |           |
|-------------------|--------------------------------|-----------|
| <i>PmurQ</i>  fwd | AAAAGAATTCCACCAATCTGGCGGCCACTC | This work |
|-------------------|--------------------------------|-----------|

|                   |                                |           |
|-------------------|--------------------------------|-----------|
| <i>PmurQ</i>  rev | TTTTAAGCTTCATAAGGCTTCTCGGCAAAT | This work |
|-------------------|--------------------------------|-----------|

|                   |                                |           |
|-------------------|--------------------------------|-----------|
| <i>PhapR</i>  fwd | AAAAGAATTCCATACCATTCTCGTTGTGTT | This work |
|-------------------|--------------------------------|-----------|

|                   |                                |           |
|-------------------|--------------------------------|-----------|
| <i>PhapR</i>  rev | TTTTAAGCTTCATAGGGGTATATCCTTGCC | This work |
|-------------------|--------------------------------|-----------|

|                     |                                |           |
|---------------------|--------------------------------|-----------|
| <i>PVC0585</i>  fwd | AAAAGAATTCCATAGGGGTATATCCTTGCC | This work |
|---------------------|--------------------------------|-----------|

|                     |                                |           |
|---------------------|--------------------------------|-----------|
| <i>PVC0585</i>  rev | TTTTAAGCTTCATACCATTCTCGTTGTGTT | This work |
|---------------------|--------------------------------|-----------|

|                     |                              |           |
|---------------------|------------------------------|-----------|
| <i>PVC0502</i>  fwd | AAAAGAATTGACAAAAGTTTGTGGCCGC | This work |
|---------------------|------------------------------|-----------|

|                     |                                |           |
|---------------------|--------------------------------|-----------|
| <i>PVC0502</i>  rev | TTTTAAGCTTCATAGTATTGGCTTTGGCAT | This work |
|---------------------|--------------------------------|-----------|

|                   |                                |           |
|-------------------|--------------------------------|-----------|
| <i>PmutH</i>  fwd | AAAAGAATTCACCAGACCACATGAAGATCC | This work |
|-------------------|--------------------------------|-----------|

|                   |                                |           |
|-------------------|--------------------------------|-----------|
| <i>PmutH</i>  rev | TTTTAAGCTTCATAAAGGCTTTCGGTTTGG | This work |
|-------------------|--------------------------------|-----------|

|                   |                               |           |
|-------------------|-------------------------------|-----------|
| <i>PleuO</i>  fwd | AAAAGAATTCTAATGAACTGACTAACTCA | This work |
|-------------------|-------------------------------|-----------|

|                   |                               |           |
|-------------------|-------------------------------|-----------|
| <i>PleuO</i>  rev | TTTTAAGCTTCATTGCGTCTTTTTTATCT | This work |
|-------------------|-------------------------------|-----------|

|                     |                                |           |
|---------------------|--------------------------------|-----------|
| <i>PVC0433</i>  fwd | AAAACAATTGTACCTGCAACTTCAAGTAGT | This work |
|---------------------|--------------------------------|-----------|

|                     |                                |           |
|---------------------|--------------------------------|-----------|
| <i>PVC0433</i>  rev | TTTTAAGCTTCATTATTTTTTAATCACCAA | This work |
|---------------------|--------------------------------|-----------|

|                     |                                |           |
|---------------------|--------------------------------|-----------|
| <i>PVC0241</i>  fwd | AAAAGAATTCCTATAGATGCGAACAGTTGC | This work |
|---------------------|--------------------------------|-----------|

|                     |                                |           |
|---------------------|--------------------------------|-----------|
| <i>PVC0241</i>  rev | TTTTAAGCTTCATAGTATGCTGACTACTGC | This work |
|---------------------|--------------------------------|-----------|

|                   |                                |           |
|-------------------|--------------------------------|-----------|
| <i>PrfaD</i>  fwd | AAAACAATTGCATAGTATGCTGACTACTGC | This work |
|-------------------|--------------------------------|-----------|

|                   |                                |           |
|-------------------|--------------------------------|-----------|
| <i>PrfaD</i>  rev | TTTTAAGCTTCATTATGAATTCCTATAGAT | This work |
|-------------------|--------------------------------|-----------|

|                     |                                 |           |
|---------------------|---------------------------------|-----------|
| <i>PVC0620</i>  fwd | AAAAGAATTCAAACCGTACCCGTTTTGCGAG | This work |
|---------------------|---------------------------------|-----------|

|                     |                                |           |
|---------------------|--------------------------------|-----------|
| <i>PVC0620</i>  rev | TTTTAAGCTTACTAGTAAGGAACAGCTATG | This work |
|---------------------|--------------------------------|-----------|

|                     |                              |           |
|---------------------|------------------------------|-----------|
| <i>PVC0688</i>  fwd | AAAAGAATTCATAGCGTTTGTCTTTTGT | This work |
|---------------------|------------------------------|-----------|

|                     |                                |           |
|---------------------|--------------------------------|-----------|
| <i>PVC0688</i>  rev | TTTTAAGCTTCATTACTATCCATTTTTTCA | This work |
|---------------------|--------------------------------|-----------|

|                     |                               |           |
|---------------------|-------------------------------|-----------|
| <i>PVC1298</i>  fwd | AAAAGAATTCATAAACTCTTTGTATAATT | This work |
|---------------------|-------------------------------|-----------|

|                     |                                 |           |
|---------------------|---------------------------------|-----------|
| <i>PVC1298</i>  rev | TTTTAAGCTTCATGATAGTTTTGTAAATTAT | This work |
|---------------------|---------------------------------|-----------|

|                     |                                |           |
|---------------------|--------------------------------|-----------|
| <i>PVC1375</i>  fwd | AAAACAATTGCATCCACTTCTTCCTTATTA | This work |
|---------------------|--------------------------------|-----------|

|                     |                               |           |
|---------------------|-------------------------------|-----------|
| <i>PVC1375</i>  rev | TTTTAAGCTTCATATCAAAGTGGTTGGGA | This work |
|---------------------|-------------------------------|-----------|

|                     |                               |           |
|---------------------|-------------------------------|-----------|
| <i>PVC1376</i>  fwd | AAAACAATTGCATATCAAAGTGGTTGGGA | This work |
|---------------------|-------------------------------|-----------|

|                     |                                |           |
|---------------------|--------------------------------|-----------|
| <i>PVC1376</i>  rev | TTTTAAGCTTCATCCACTTCTTCCTTATTA | This work |
|---------------------|--------------------------------|-----------|

|                     |                                |           |
|---------------------|--------------------------------|-----------|
| <i>PVC1403</i>  fwd | AAAAGAATTCATTTTTTGGGTAAATCGATA | This work |
|---------------------|--------------------------------|-----------|

|                     |                                |           |
|---------------------|--------------------------------|-----------|
| <i>PVC1403</i>  rev | TTTTGGATCCCATGGAAAACCTCGTTGTTT | This work |
|---------------------|--------------------------------|-----------|

|                     |                               |           |
|---------------------|-------------------------------|-----------|
| <i>PVC1405</i>  fwd | AAAAGAATTCATGGAAAACCTCGTTGTTT | This work |
|---------------------|-------------------------------|-----------|

|              |                                  |           |
|--------------|----------------------------------|-----------|
| PVC1405 rev  | TTTTGGATCCCATTTTTTGGGTAATCGATA   | This work |
| PVC1436 fwd  | AAAAGAATTCCCAATTCGTAAAGAAGCTAA   | This work |
| PVC1436 rev  | TTTTGGATCCCATATCTGCTGAGGCTTTAG   | This work |
| PVC2352 fwd  | AAAAGAATTCTCAGCACAATATCTCGCGCC   | This work |
| PVC2352 rev  | TTTTAAGCTTCATGCCGATGAGGCTCATAA   | This work |
| PVCA0218 fwd | AAAAGAATTCCATATAAACCTCACTGACTC   | This work |
| PVCA0218 rev | TTTTAAGCTTCATCGTTTACTTCTTATCAT   | This work |
| PVCA0219 fwd | AAAAGAATTCCATCGTTTACTTCTTATCAT   | This work |
| PVCA0219 rev | TTTTAAGCTTCATATAAACCTCACTGACTC   | This work |
| PVCA0662 fwd | AAAAGAATTCTCAGTTTGTAATTGAGGAA    | This work |
| PVCA0662 rev | TTTTAAGCTTCATATCAAATATGAATCCTT   | This work |
| PVCA0663 fwd | AAAAGAATTCCATATCAAATATGAATCCTT   | This work |
| PVCA0663 rev | TTTTAAGCTTCATGGTGTTACCTACTTGTT   | This work |
| PVCA0906 fwd | AAAAGAATTCATTTTTATCCTGACCCCATATA | This work |
| PVCA0906 rev | TTTTGGATCCCATGCCTACGCCTATCGCCG   | This work |
| PVCA0960 fwd | AAAAGAATTCCATCATGAGTTATATTTACA   | This work |
| PVCA0960 rev | TTTTAAGCTTCATCCCTCAATCCTCAGTTT   | This work |
| PVCA0961 fwd | AAAAGAATTCCATCCCTCAATCCTCAGTTT   | This work |
| PVCA0961 rev | TTTTAAGCTTCATCATGAGTTATATTTACA   | This work |

Oligonucleotides for sequencing cloned DNA in plasmid constructs (5' to 3')

|               |                              |           |
|---------------|------------------------------|-----------|
| pRW50 seq fwd | GTTCTCGCAAGGACGAGAATTC       | This work |
| pRW50 seq rev | GTCGTTGAACTGAGCCTGAAATTCAGG  | This work |
| pSR seq fwd   | GTGCCACCTGACGTCTAAGAAACC     | This work |
| pSR seq rev   | GCAACCGAGCGTTCTGAACAAATCC    | This work |
| pAM seq fwd   | ATTTATTCCAATGTCACACACTTTTCGC | This work |
| pAM seq rev   | GAAACGCCGTAGCGCCGATGGTAGT    | This work |

Oligonucleotides for amplifying DNA for radio labelling (5' to 3')

|                      |                                   |           |
|----------------------|-----------------------------------|-----------|
| pSR footprinting fwd | [BIOTIN]-CACGAGGCCCTTTCGTCTTCTC   | This work |
| pSR footprinting rev | GGAGTTCTGAGGTCATTACTGGAG          | This work |
| pSR footprinting rev | CACGAGGCCCTTTCGTCTTCTC            | This work |
| pSR footprinting rev | [BIOTIN]-GGAGTTCTGAGGTCATTACTGGAG | This work |

Oligonucleotides for cloning DNA fragments in pKAS32 (5' to 3')

|            |                                                         |           |
|------------|---------------------------------------------------------|-----------|
| pKAS32 fwd | GCAGGCACAAGCGGCCGCCTGCAGCTGGCGCCA<br>TCGATACGCGTACGTCCG | This work |
| pKAS32 rev | CACGGTTTCATTAACAACCGGTACCTCTAGAACT                      | This work |

|                          |                                              |           |
|--------------------------|----------------------------------------------|-----------|
|                          | ATAGCTAGCATGCGCAAATTTAAAGCGCTG               | This work |
| <i>crp</i>  arm up fwd   | CGGTTGTTAATGAAACCGTGGATATTAATGC              | This work |
| <i>crp</i>  arm up rev   | ATCGGGGCACCTAGCCGATTTTTCCGGTTTC              | This work |
| <i>crp</i>  arm down fwd | AATCGGCTAGGTGCCCGATAACCCGTC                  | This work |
| <i>crp</i>  arm down rev | AGGCGGCCGCTTGTGCCTGCGCAGCCAA                 | This work |
| <i>hapR</i>  arm1 fwd    | CTAGAGGTACCGTTGTTAATCCCAACCCCGATT<br>GGTAATC | This work |
| <i>hapR</i>  arm1 rev    | TGTGTTTCATTTTCTTGGGCAGCACAAAG                | This work |
| <i>hapR</i>  arm2 fwd    | GCCCAAGAAAATGAAACACACAGTTGAAGTC              | This work |
| <i>hapR</i>  arm2 rev    | CGCCAGCTGCAGGCGGCCGCTATGCGGTCGATGT<br>GCTGA  | This work |

Oligonucleotides for mutagenesis of *crp* or *hapR* (5' to 3')

|                      |                                    |           |
|----------------------|------------------------------------|-----------|
| hapR R123E fwd       | TGCTTCAACCGAGGACGAAGTTTGGC         | This work |
| hapR R123A fwd       | TGCTTCAACCGCTGACGAAGTTTGGCC        | This work |
| hapR R123 rev        | CTCCACTCAAACCAGACTTTG              | This work |
| <i>crp</i>  E55R fwd | GATCAAAGATCGTGAAGGTAAAGAGATGATTCTC | This work |
| <i>cpr</i>  E55A fwd | GATCAAAGATGCGGAAGGTAAAGAGATGATTC   | This work |
| <i>crp</i>  E55 rev  | AGTACCGCAACTGAACCT                 | This work |

<sup>1</sup>E7946  $\Delta luxO$ ,  $\Delta hapR$ ,  $\Delta luxO\Delta hapR$  and  $\Delta murP$  derivatives are synonymous with strains SAD764, SAD793, TND3765 and SAD268.

<sup>2</sup>sequences in italic are sites for restriction endonucleases for use during cloning

<sup>3</sup>underlined sequences encode amino acid substitutions or remove unwanted sites for restriction endonucleases

## REFERENCES

1. Levine, M.M., Black, R.E., Clements, M.L., Cisneros, L., Saah, A., Nalin, D.R., Gill, D.M., Craig, J.P., Young, C.R. and Ristaino, P. (1982) The pathogenicity of nonenterotoxigenic vibrio cholerae serogroup O1 biotype ei tor isolated from sewage water in Brazil. *J. Infect. Dis.*, **145**, 296–299.
2. Hayes, C.A., Dalia, T.N. and Dalia, A.B. (2017) Systematic genetic dissection of PTS in *Vibrio cholerae* uncovers a novel glucose transporter and a limited role for PTS during infection of a mammalian host. *Mol. Microbiol.*, **104**, 568–579.
3. Page, L., Griffiths, L. and Cole, J.A. (1990) Different physiological roles of two independent pathways for nitrite reduction to ammonia by enteric bacteria. *Arch. Microbiol.*, **154**, 349–354.
4. De Lorenzo, V., Cases, I., Herrero, M. and Timmis, K.N. (1993) Early and late responses of TOL promoters to pathway inducers: identification of postexponential promoters in *Pseudomonas putida* with lacZ-tet bicistronic reporters. *J. Bacteriol.*, **175**, 6902.
5. Kolb, A., Kotlarz, D., Kusano, S. and Ishihama, A. (1995) Selectivity of the *Escherichia coli* RNA polymerase E $\sigma$ 38 for overlapping promoters and ability to support CRP activation. *Nucleic Acids Res.*, **23**, 819–826.

6. Manneh-Roussel,J., Haycocks,J.R.J., Magán,A., Perez-Soto,N., Voelz,K., Camilli,A., Krachler,A.M. and Grainger,D.C. (2018) Camp receptor protein controls *Vibrio cholerae* gene expression in response to host colonization. *MBio*, **9**.
7. Haycocks,J.R.J., Sharma,P., Stringer,A.M., Wade,J.T. and Grainger,D.C. (2015) The Molecular Basis for Control of ETEC Enterotoxin Expression in Response to Environment and Host. *PLoS Pathog.*, **11**, 1–16.
8. Ditta,G., Stanfield,S., Corbin,D., Helinski,D.R. and Donald Helinski,C.R. (1980) Broad host range DNA cloning system for Gram-negative bacteria: Construction of a gene bank of *Rhizobium meliloti* (plasmid RK2/plasmid vehicle/conjugal transfer/nif genes). *Genet. Downloaded Univ. Birmingham*, **77**, 7347–735.
9. Skorupski,K. and Taylor,R.K. (1996) Positive selection vectors for allelic exchange. *Gene*, **169**, 47–52.
